# Supplementary material for: Genome-Wide Analysis of the PHT Gene Family and Its Response to Mycorrhizal Symbiosis in Tomatoes under Phosphate Starvation Conditions
Source: MDPI journal article supplement (doi:10.3390/ijms241210246), 2023-06-16
Supplement: s1 [file s1]

**Table S1** Nutrient solution composition used in this study

| Macronutrient solution( $\mu\text{M}$ )                             |                 |                  |                   |
|---------------------------------------------------------------------|-----------------|------------------|-------------------|
|                                                                     | 0 $\mu\text{M}$ | 25 $\mu\text{M}$ | 200 $\mu\text{M}$ |
| $\text{MgSO}_4 \cdot 7\text{H}_2\text{O}$                           | 1000            | 1000             | 1000              |
| $\text{KNO}_3$                                                      | 2500            | 2500             | 2500              |
| $\text{NaH}_2\text{PO}_4 \cdot 2\text{H}_2\text{O}$                 | 0               | 25               | 200               |
| $\text{NaCl}$                                                       | 1000            | 975              | 800               |
| $\text{KCl}$                                                        | 1000            | 1000             | 1000              |
| $\text{Ca}(\text{NO}_3)_2 \cdot 4\text{H}_2\text{O}$                | 2500            | 2500             | 2500              |
| Micronutrient solution ( $\mu\text{M}$ )                            |                 |                  |                   |
| EDTA-Fe                                                             | 24.52           |                  |                   |
| $\text{H}_3\text{BO}_3$                                             | 22.98           |                  |                   |
| $\text{MnSO}_4 \cdot \text{H}_2\text{O}$                            | 10.00           |                  |                   |
| $\text{ZnSO}_4 \cdot 7\text{H}_2\text{O}$                           | 0.66            |                  |                   |
| $\text{CuSO}_4 \cdot 5\text{H}_2\text{O}$                           | 0.32            |                  |                   |
| $(\text{NH}_4)_6\text{Mo}_7\text{O}_{24} \cdot 4\text{H}_2\text{O}$ | 0.07            |                  |                   |

**Table S2** Primers of *SIPHT* genes used in the experiments.

| Gene name | Primer sequence (5'→3')    |                              |
|-----------|----------------------------|------------------------------|
|           | Forward                    | Reverse                      |
| SIPT1     | AGGGGAAGAGGAACTGTAGCTG     | ATACCACAAATTAAC TCAAAC TGCAT |
| SIPT2     | GCCAGAGCCAAAAGGAAAATC      | TGCAACAAACAAGCTTACACAATACA   |
| SIPT3     | TTGTGTTAGGTTGTGTGAATTTTCTT | AGCTCTTTGCACGATCTTAAATGAC    |
| SIPT4     | CGGGCAGAATGAGACACAGATG     | TGAAGATAGAAAGCACAAGGCGTAGT   |
| SIPT5     | GCAGAACGAGACGCAGATGAA      | TGCTGAATTTGATAAACTTGCCAA     |
| SIPT6     | GCCAGAGCCAAAAGGAAAATC      | AAGAGTTGCATCAGTCATCACACA     |
| SIPT7     | AGGGGAAGTCACTGGAAGAGATG    | GCAGCAATGACAGATAACCTAATACGT  |
| SIPT8     | AAGGGAAAACGAAGACTCAGCAC    | AGGTTGAGGTAAAGAACTATAGTGCT   |
| SIPHT2    | AGATTGCAACTTCCTGGGCA       | CCGAGAAGTTTGTGCTGCAT         |
| SIPHT3;1  | CAACAATGCGAAGGGTGCAA       | ATCCCCATTGAGCACCAGT          |
| SIPHT3;2  | TCTAACCCCGCTGACAACAT       | TCACAACTGGTCCAACAAGC         |
| SIPHT3;3  | GCCTGGATTTGCTAGAGGCT       | TGTCGTCCCCATAGAGGTACA        |
| SIPHT3;4  | ATTGTGTCACACCCTGCTGA       | AGACCGCGAGTACAAAGACC         |
| SIPHT4;1  | CACAACTGCTGTTTCGGCTG       | CGCTCCAATTGAGCCAGTTC         |
| SIPHT4;2  | TCTCCCGGGAAAGAAGACGA       | CCGGGATCTTCCATGCTTCT         |
| SIPHT4;3  | CATGGCCTATTGGTCCGCTT       | CGACGTTCCATCCTCTCCAT         |
| SIPHT4;4  | TGGGTAGTGGGGTTTTGGTG       | ACAAGGCCACCCAATAGACTG        |
| SIPHO1;1  | CAGTTATGGTTCTCGATCGTCT     | GTCGAATAACTTCCAATGAGGC       |
| SIPHO1;2  | CCAATTCTTCTTCAAGCGAAA      | GATGATTTTGGACTGTCCGATG       |
| SIPHO1;3  | CTACAGGGTAACAGGGCTATTT     | TGCTCATTTCTCCAACCTGTAAT      |
| SIPHO1;4  | CGGTTGATGGGAAGCTTTGGA      | CCAACCTTACGACTATCTTTCGCTT    |
| SIPHO1;5  | CCTTCAATTGGTATGCGTAGTG     | CAAAATCTCTATTGGAGCAGGC       |
| SIPHO1;6  | AAAGTAGGGGAAGTTAAGGTGG     | TGTGGTCTACCTGGACTACTAA       |
| UBIquitin | TCGTAAGGAGTGCCCTAATGCTGA   | CAATCGCCTCCAGCCTTGTTGTAA     |
| EF        | CTCCATTGGGTCGTTTTGCT       | GGTCACCTTGGCACCAGTTG         |

**Table S3** Fifty different motifs commonly observed in SIPHT proteins

| Motif | Motif sequence                                     | Width |
|-------|----------------------------------------------------|-------|
| 1     | MATLCFFRFWLGFGIGGDYPLSATIMSEYANKKTRGAFIAAVFAMQGFGI | 50    |
| 2     | VPQADYVWRIILMFGALPALLTYYWWMKMPETARYTALVAKBAKQAAADM | 50    |
| 3     | VLNALDTAKTQLYHFTAIVIAGMGFFTDAYDLFCISLVTKLLGRJYYHKP | 50    |
| 4     | QTLIALCSTVPGYWFTVAFIDKIGRFQIQLMGFFFMTVFMFAJAIPYHHW | 50    |
| 5     | YSLTFFFANFGPNATTFVVPAEIFPARLRSTCHGISAAAGKAGAMVGAFG | 50    |
| 6     | RHGLHLLGTASTWFLLDIAFYSQLFQKDIFSAIGWIPKAKTMNALZEVY  | 50    |
| 7     | PGSLPPNVSAAVNGVALVGTLAGQLFFGWLGDKMGRKKVYGMTLMJMVIC | 50    |
| 8     | KTDAGYPAGIGIKNSLIVLGCVNLLGMLFTFLVPESKGKSLEEMSRENEG | 50    |
| 9     | ACLEIJRRGMWNFFRLENEHLNNVGKYRAVKSVPLPFNYDD          | 41    |
| 10    | PLNIIYRSSRFFIRVIWRCLCAPLYKVTLPDFFLADQLTSQVQAIRSLZ  | 50    |
| 11    | FPLYSLFAYIVLHMLLYGANIYYWKRYRINYSFIFGFKQGTELKYREVFL | 50    |
| 12    | WKVLVLVTSGIATVYNTYWDLVVDWGLLQRKSKNPWLRDKLLPHKSV    | 48    |
| 13    | CPFEAVKVRVQTQPGFARGLSDGLPKFVRAEGAAGLYKGLVPLWGRQIPY | 50    |
| 14    | LSCGLTHMAVTPLDLVKCNMQIDPAKYKSISSGFGVLLKEQGPRGFFRGW | 50    |
| 15    | LKTYSYLNLLAFSKILKKYDKITSRKASKSYLKVVVDKSYLGSSDEVTKL | 49    |
